# Supplementary material
Source: PubMed Central journal article supplement (PMC7328002)
Supplement: develop-147-183640-s1.pdf [file develop-147-183640-s1.pdf]

**Table S1. Experimental statistics for toxin-mediated ablation of zebrafish neurons** (related to Figure 1).

| Panel | Transgenic line (heterozygous)                                     | Stage  | Treatment     | Total number of animals | Animals with neural ablation <sup>1</sup> |
|-------|--------------------------------------------------------------------|--------|---------------|-------------------------|-------------------------------------------|
| C     | <i>Tg(tuba1a:Gal4VP16;myl7:gfp)</i>                                | 24 hpf | None          | 21                      | 0                                         |
| C     | <i>Tg(tuba1a:Gal4VP16;myl7:gfp)</i>                                | 24 hpf | Rimantadine   | 25                      | 0                                         |
| C     | <i>Tg(tuba1a:Gal4VP16;myl7:gfp)</i>                                | 48 hpf | None          | 20                      | 0                                         |
| C     | <i>Tg(tuba1a:Gal4VP16;myl7:gfp)</i>                                | 48 hpf | Rimantadine   | 24                      | 0                                         |
| C     | <i>Tg(tuba1a:Gal4VP16;myl7:gfp)</i>                                | 72 hpf | None          | 30                      | 0                                         |
| C     | <i>Tg(tuba1a:Gal4VP16;myl7:gfp)</i>                                | 72 hpf | Rimantadine   | 28                      | 0                                         |
| C     | <i>Tg(tuba1a:Gal4VP16;UAS:M2<sup>H37A</sup>;myl7:gfp, mCherry)</i> | 24 hpf | None          | 24                      | 24                                        |
| C     | <i>Tg(tuba1a:Gal4VP16;UAS:M2<sup>H37A</sup>;myl7:gfp, mCherry)</i> | 24 hpf | Rimantadine   | 22                      | 0                                         |
| C     | <i>Tg(tuba1a:Gal4VP16;UAS:M2<sup>H37A</sup>;myl7:gfp, mCherry)</i> | 48 hpf | None          | 20                      | 20                                        |
| C     | <i>Tg(tuba1a:Gal4VP16;UAS:M2<sup>H37A</sup>;myl7:gfp, mCherry)</i> | 48 hpf | Rimantadine   | 25                      | 0                                         |
| C     | <i>Tg(tuba1a:Gal4VP16;UAS:M2<sup>H37A</sup>;myl7:gfp, mCherry)</i> | 72 hpf | None          | 32                      | 32                                        |
| C     | <i>Tg(tuba1a:Gal4VP16;UAS:M2<sup>H37A</sup>;myl7:gfp, mCherry)</i> | 72 hpf | Rimantadine   | 31                      | 0                                         |
| D     | <i>Tg(tuba1a:Gal4VP16;UAS:NTR-mCherry;myl7:GFP)</i>                | 24 hpf | DMSO          | 25                      | 0                                         |
| D     | <i>Tg(tuba1a:Gal4VP16;UAS:NTR-mCherry;myl7:GFP)</i>                | 24 hpf | Metronidazole | 32                      | 0                                         |
| D     | <i>Tg(tuba1a:Gal4VP16;UAS:NTR-mCherry;myl7:GFP)</i>                | 48 hpf | DMSO          | 26                      | 0                                         |
| D     | <i>Tg(tuba1a:Gal4VP16;UAS:NTR-mCherry;myl7:GFP)</i>                | 48 hpf | Metronidazole | 25                      | 3                                         |

|   |                                                                               |        |               |    |    |
|---|-------------------------------------------------------------------------------|--------|---------------|----|----|
| D | Tg( <i>tuba1a:Gal4VP16</i> ;<br><i>UAS:NTR-mCherry</i> ;<br><i>myl7:GFP</i> ) | 72 hpf | DMSO          | 31 | 0  |
| D | Tg( <i>tuba1a:Gal4VP16</i> ;<br><i>UAS:NTR-mCherry</i> ;<br><i>myl7:GFP</i> ) | 72 hpf | Metronidazole | 28 | 28 |

<sup>1</sup>Neural ablation was scored by the lack of the midbrain-hindbrain boundary at 24 hpf and presence of dead tissue in the head at 32 and 48 hpf.

**Table S2. Experimental statistics for GAVPO- and light-mediated nitroreductase expression** (related to Figure 2).

| Panel | Transgenic line (heterozygous) | Experimental condition            | Total number of animals | Animals with mCherry expression |
|-------|--------------------------------|-----------------------------------|-------------------------|---------------------------------|
| B     | <i>Tg(UAS:NTR-mCherry)</i>     | Uninjected<br>470-nm light        | 56                      | 0                               |
| B     | <i>Tg(UAS:NTR-mCherry)</i>     | 100 pg GAVPO mRNA<br>470-nm light | 39                      | 39                              |
| B     | <i>Tg(UAS:NTR-mCherry)</i>     | 200 pg GAVPO mRNA<br>470-nm light | 33                      | 33                              |
| B     | <i>Tg(UAS:NTR-mCherry)</i>     | 200 pg GAVPO mRNA                 | 48                      | 2                               |

**Table S3. Experimental statistics for GAVPO- and light-mediated toxin expression (related to Figure 3).**

| Panel | Transgenic line (heterozygous)                      | Experimental condition                            | Total number of animals | Animals with axial mCherry expression |
|-------|-----------------------------------------------------|---------------------------------------------------|-------------------------|---------------------------------------|
| A     | <i>Tg(UAS:NTR-mCherry)</i>                          | Uninjected<br>DMSO<br>470-nm light                | 14                      | 0                                     |
| A     | <i>Tg(UAS:NTR-mCherry)</i>                          | 50 pg GAVPO mRNA<br>470-nm light<br>DMSO          | 11                      | 8                                     |
| A     | <i>Tg(UAS:NTR-mCherry)</i>                          | 50 pg GAVPO mRNA<br>470-nm light<br>Metronidazole | 10                      | 7                                     |
| A     | <i>Tg(UAS:NTR-mCherry)</i>                          | 50 pg GAVPO mRNA<br>DMSO                          | 19                      | 0                                     |
| Panel | Transgenic line (heterozygous)                      | Experimental condition                            | Total number of animals | Animals with axial defects            |
| D     | <i>Tg(UAS:M2<sup>H37A</sup>;<br/>myl7:mCherry)</i>  | Uninjected<br>470-nm light                        | 12                      | 1                                     |
| D     | <i>Tg(UAS:M2<sup>H37A</sup>;<br/>myl7:mCherry)</i>  | Uninjected<br>470-nm light<br>Rimantadine         | 12                      | 1                                     |
| D     | <i>Tg(UAS:M2<sup>H37A</sup>;<br/>myl7:mCherry)</i>  | 30 pg GAVPO mRNA<br>470-nm light                  | 25                      | 20                                    |
| D     | <i>Tg(UAS:M2<sup>H37A</sup>;<br/>myl7:mCherry)</i>  | 30 pg GAVPO mRNA<br>470-nm light<br>Rimantadine   | 25                      | 3                                     |
| D     | <i>Tg(UAS:M2<sup>H37A</sup>;<br/>myl7:mCherry))</i> | 30 pg GAVPO mRNA                                  | 50                      | 6                                     |
| D     | <i>Tg(UAS:M2<sup>H37A</sup>;<br/>myl7:mCherry)</i>  | 30 pg GAVPO mRNA<br>Rimantadine                   | 51                      | 7                                     |

**Table S4. Experimental statistics for light-inducible, neuron-specific gene expression (related to Figure 4).**

| Panel | Transgenic line (heterozygous)           | Experimental condition                       | Total number of animals | Animals with mCherry expression |
|-------|------------------------------------------|----------------------------------------------|-------------------------|---------------------------------|
| A     | <i>Tg(elavl3:GAVPO; UAS:NTR-mCherry)</i> | Global irradiation<br>30 min                 | 28                      | 28                              |
| A     | <i>Tg(elavl3:GAVPO; UAS:NTR-mCherry)</i> | Global irradiation<br>60 min                 | 25                      | 25                              |
| A     | <i>Tg(elavl3:GAVPO; UAS:NTR-mCherry)</i> | Global irradiation<br>120 min                | 30                      | 30                              |
| A     | <i>Tg(elavl3:GAVPO; UAS:NTR-mCherry)</i> | Global irradiation<br>240 min                | 24                      | 24                              |
| B     | <i>Tg(elavl3:GAVPO; UAS:NTR-mCherry)</i> | Head irradiation<br>20x objective<br>2.5 min | 12                      | 11                              |
| B     | <i>Tg(elavl3:GAVPO; UAS:NTR-mCherry)</i> | Head irradiation<br>20x objective<br>5 min   | 24                      | 22                              |
| C     | <i>Tg(elavl3:GAVPO; UAS:NTR-mCherry)</i> | Head irradiation<br>63x objective<br>1 min   | 12                      | 10                              |
| C     | <i>Tg(elavl3:GAVPO; UAS:NTR-mCherry)</i> | Head irradiation<br>63x objective<br>2.5 min | 12                      | 11                              |
| C     | <i>Tg(elavl3:GAVPO; UAS:NTR-mCherry)</i> | Head irradiation<br>63x objective<br>5 min   | 12                      | 12                              |
| D     | <i>Tg(elavl3:GAVPO; UAS:NTR-mCherry)</i> | Global irradiation<br>30 min                 | 30                      | 30                              |
| F     | <i>Tg(elavl3:GAVPO; UAS:NTR-mCherry)</i> | Spot irradiation<br>5 min                    | 24                      | 24                              |

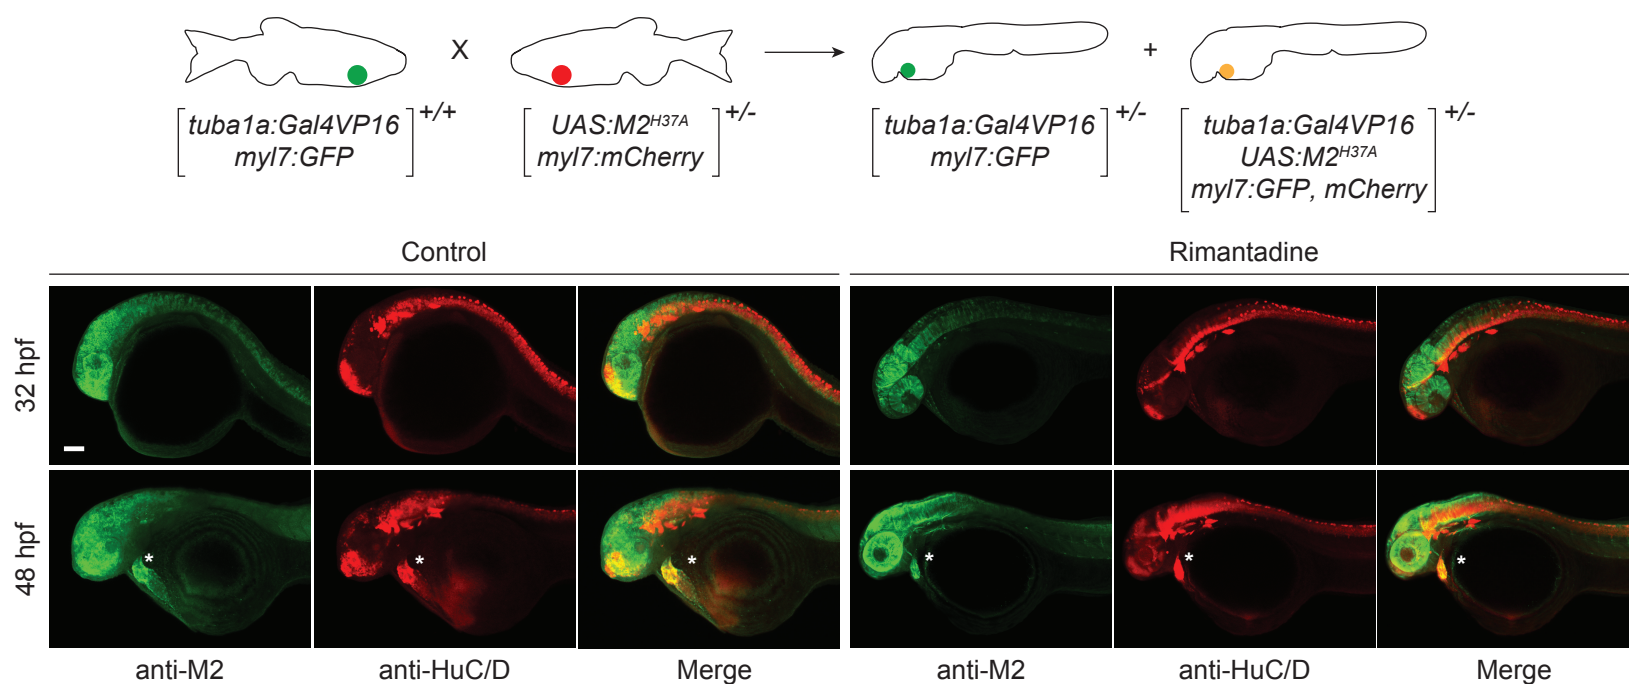

**Figure S1. Neuron-specific expression of  $M2^{H37A}$ .** Representative maximum intensity projection micrographs of heterozygous  $Tg(tuba1a:Gal4VP16;UAS:M2^{H37A};myl7:GFP, mCherry)$  embryos immunostained for the M2-derived channel (green) or HuC/D (red), an early neuronal marker. Asterisks denote residual fluorescence from reporter genes expressed in the heart. Embryo orientations: lateral view, anterior left. Scale bar: 100  $\mu$ m.

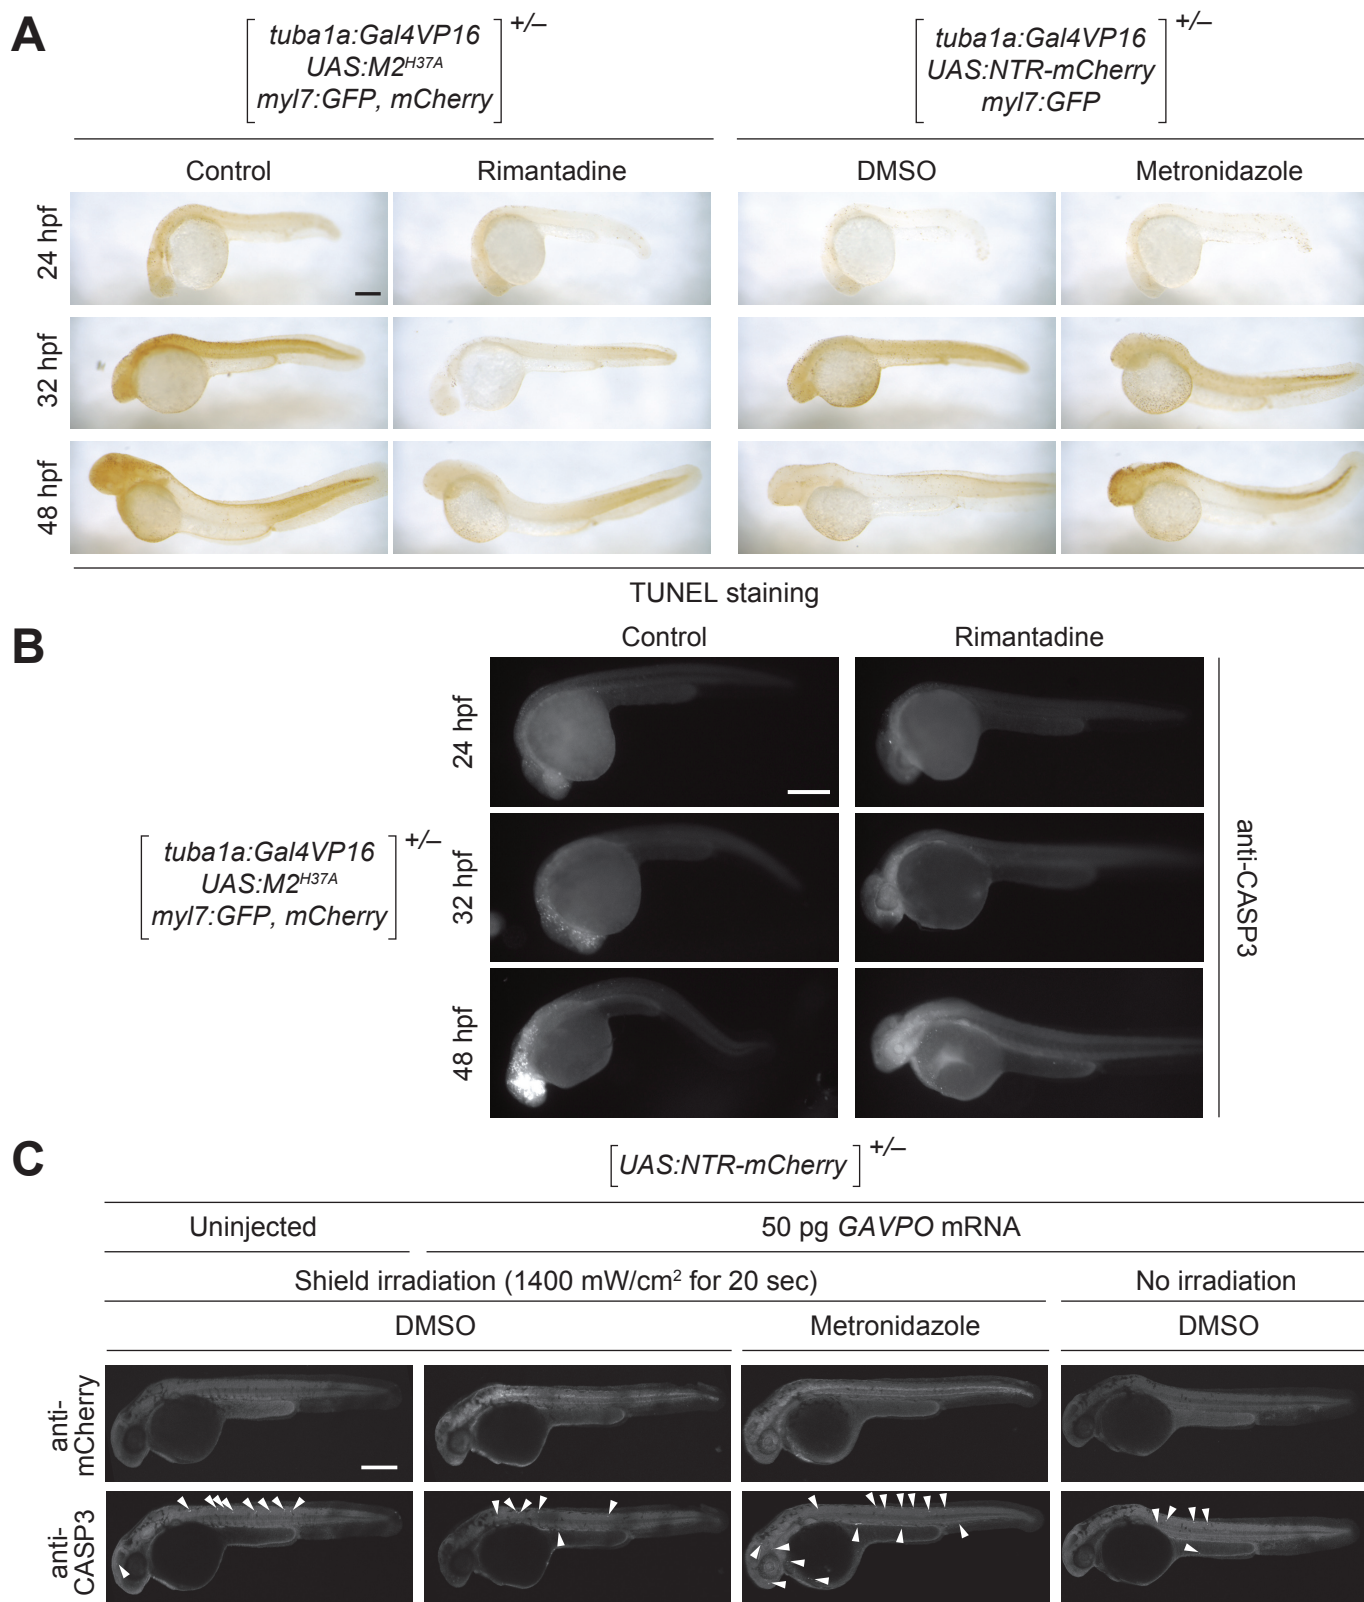

**Figure S2.  $M2^{H37A}$ - and NTR-induced cell death in zebrafish embryos.** (A) Heterozygous  $Tg(tuba1a:Gal4VP16; UAS:M2^{H37A}; myl7:GFP, mCherry)$  and  $Tg(tuba1a:Gal4VP16; UAS:NTR-mCherry; myl7:GFP)$  embryos were cultured in medium supplemented with DMSO, 100  $\mu$ g/mL rimantadine, or 5 mM metronidazole at 10 hpf. At 48 hpf, the embryos were fixed, and apoptotic cells visualized by TUNEL staining. TUNEL-positive cells were limited to the CNS at 48 hpf in NTR-expressing embryos treated with metronidazole, but they were observed outside the CNS in  $M2^{H37A}$ -expressing embryos cultured without rimantadine. (B) Heterozygous  $Tg(tuba1a:Gal4VP16; UAS:M2^{H37A}; myl7:GFP, mCherry)$  embryos cultured in the presence or absence of 100  $\mu$ g/mL rimantadine, fixed, and immunostained for activated caspase-3 (CASP3). (C) Heterozygous  $Tg(UAS:NTR-mCherry)$  zygotes were injected with the designated amount of GAVPO mRNA, and their embryonic shields were irradiated at 6 hpf. The embryos were then cultured in the absence or presence of 5 mM metronidazole from 10 to 32 hpf, fixed, and immunostained for mCherry and activated CASP3 (arrowheads). GAVPO-, light-, and metronidazole-dependent caspase-3 activation was observed. Embryo orientations: lateral view, anterior left. Scale bars: 300  $\mu$ m.

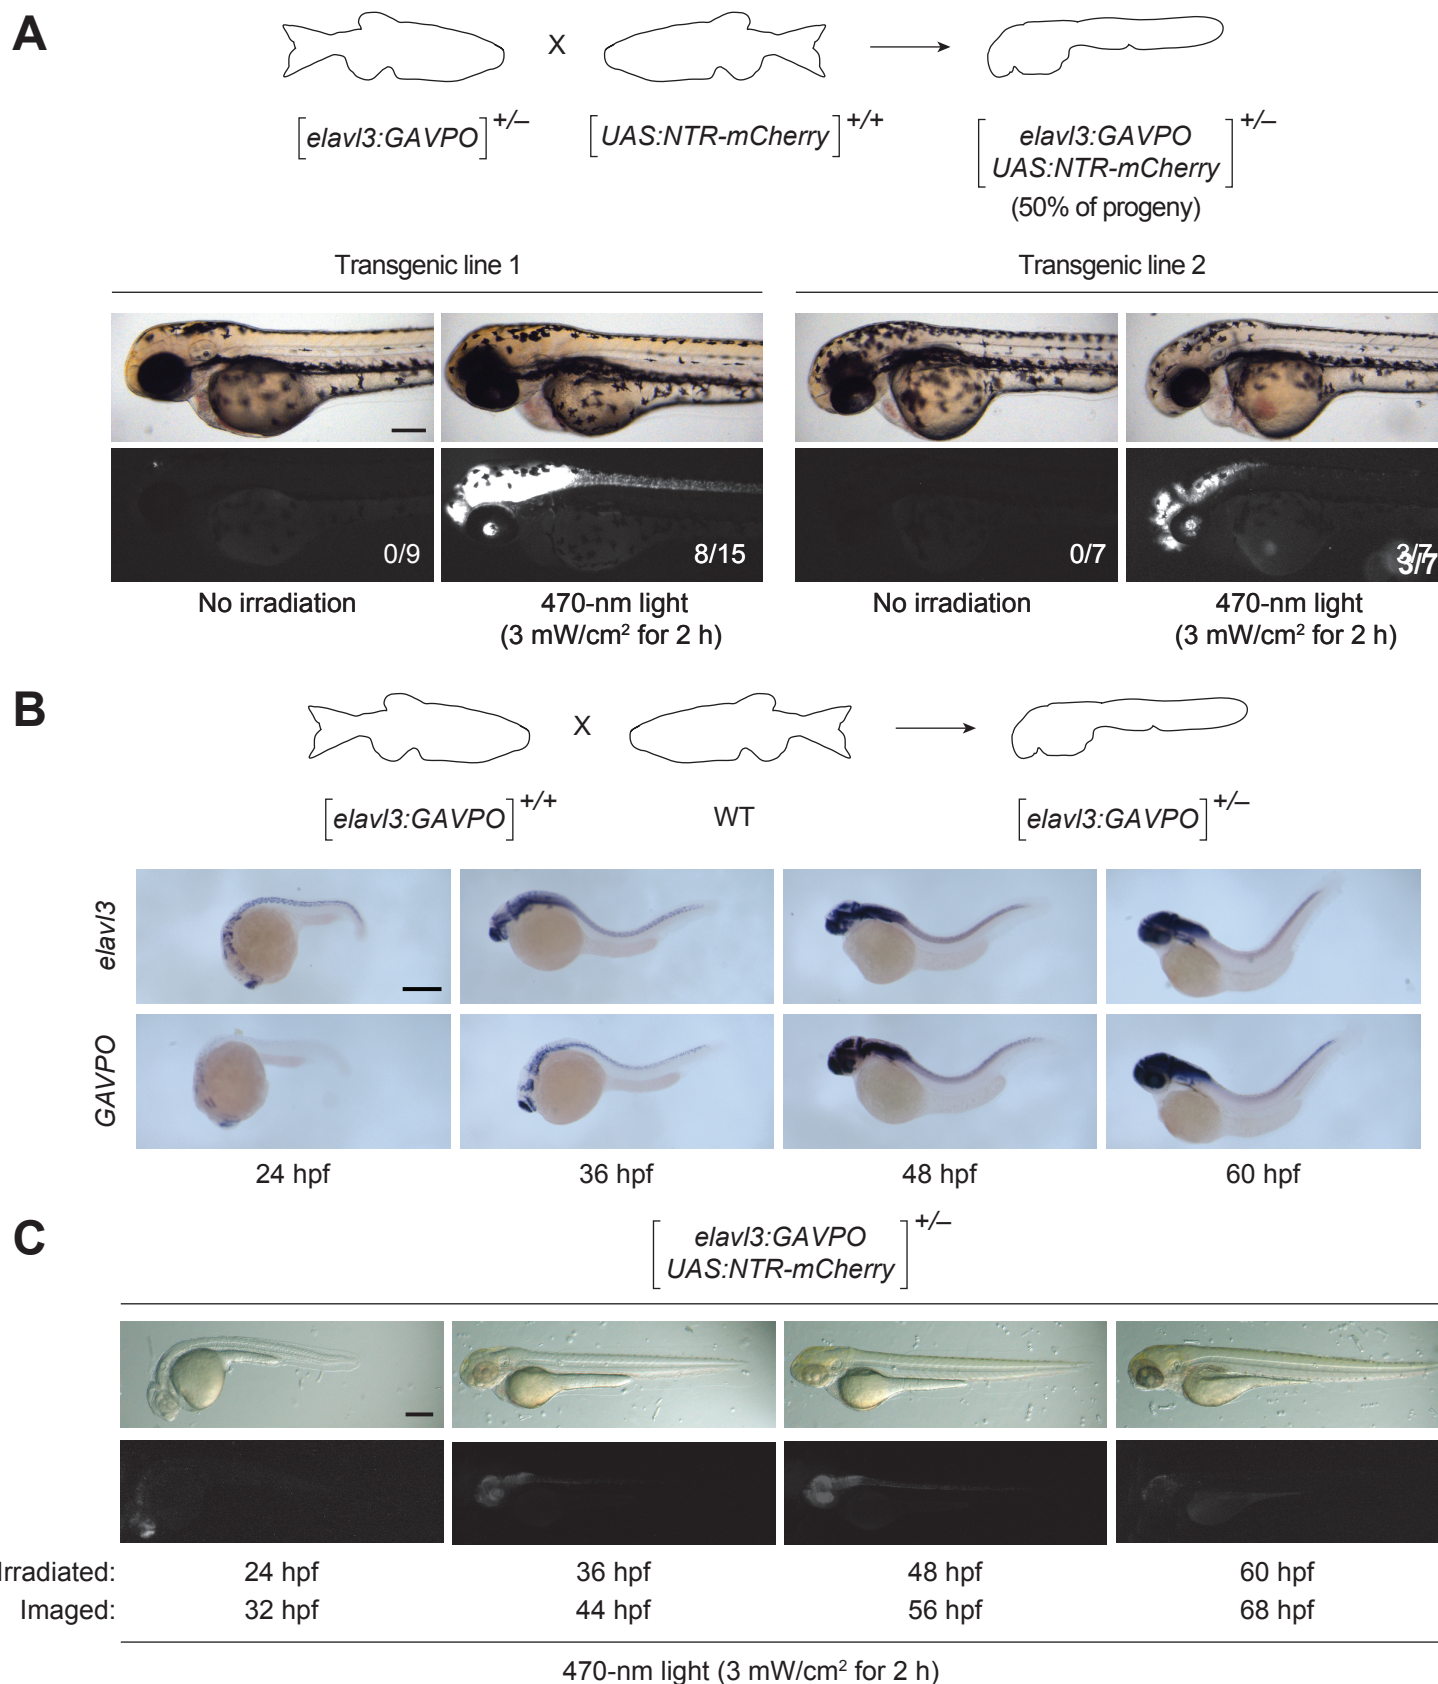

**Figure S3. Generation and characterization of *Tg(elav13:GAVPO)*zebrafish.** (A) Light-inducible reporter gene expression in two distinct heterozygous *Tg(elav13:GAVPO; UAS:NTR-mCherry)* lines. The embryos were either raised in the dark or globally irradiated with blue LED light at 32 hpf. Representative brightfield and epifluorescence micrographs from two independent experiments and the number of fluorescent embryos per condition are shown. (B) GAVPO and *elav13* expression in *Tg(elav13:GAVPO)* embryos at the designated developmental stages. (C) GAVPO- and light-dependent NTR-mCherry expression in the CNS of *Tg(elav13:GAVPO; UAS:NTR-mCherry)* zebrafish. The embryos were globally irradiated with blue LED light starting at the designated times and imaged 8 hours later. Representative brightfield and epifluorescence micrographs are shown. Embryo orientations: lateral view, anterior left. Scale bars: 300  $\mu$ m.



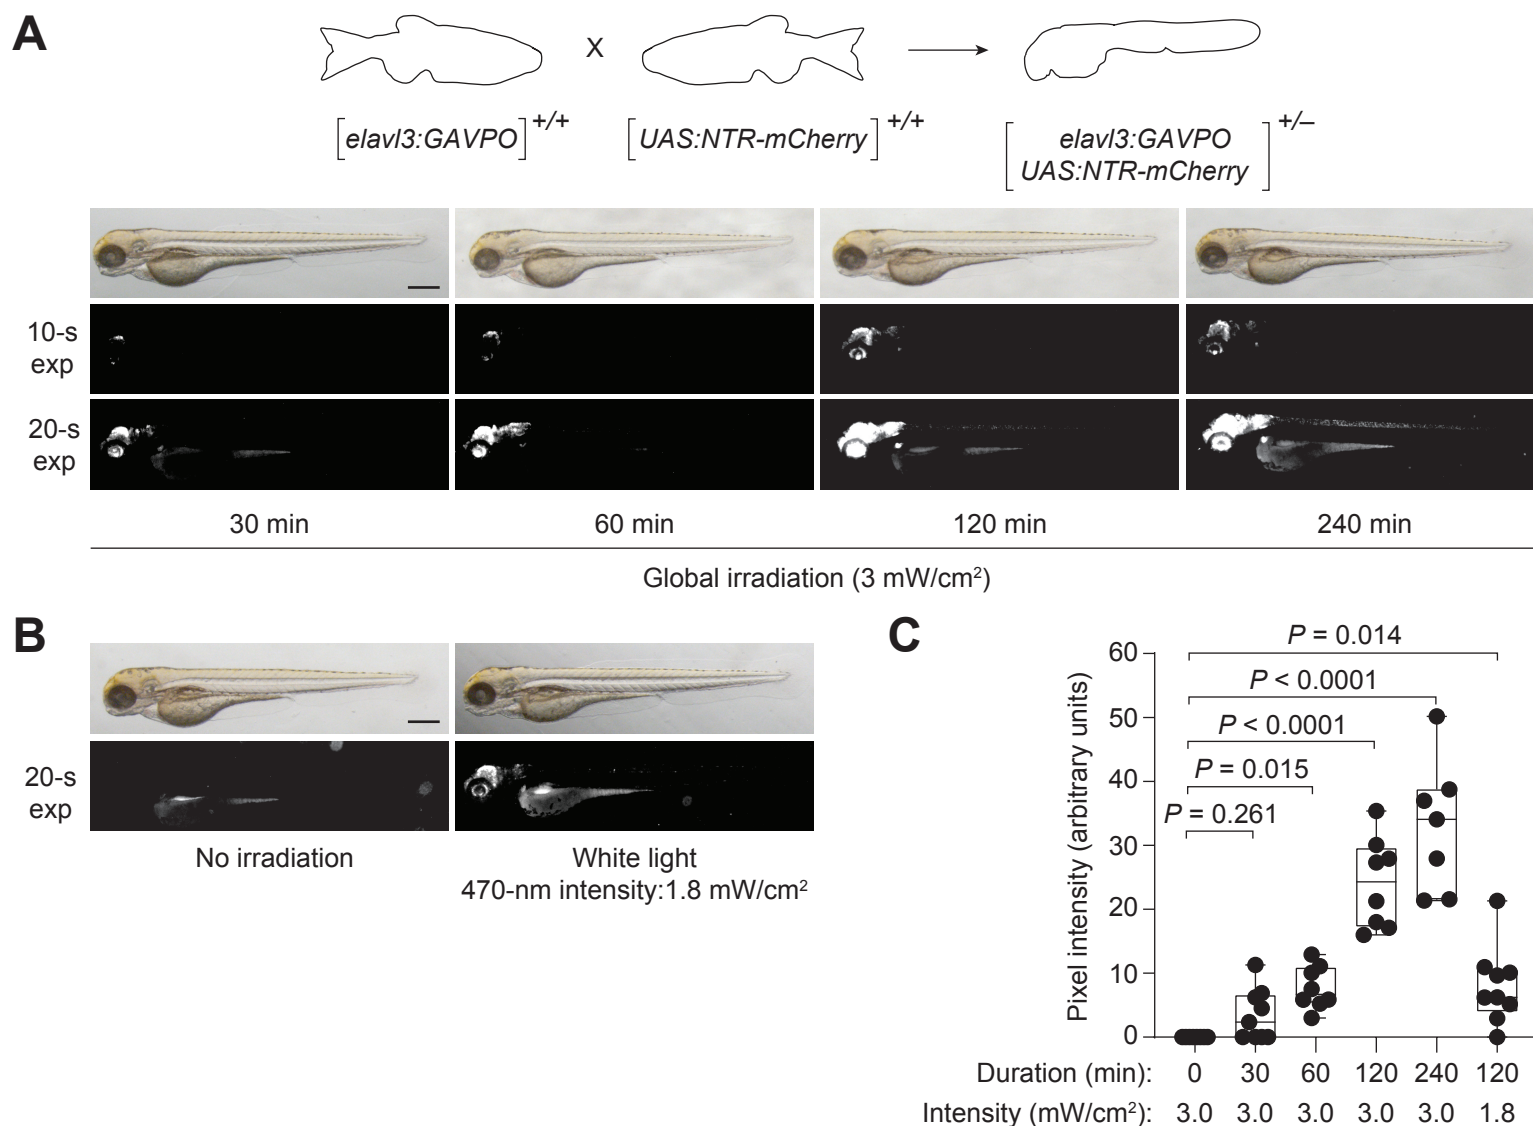

**Figure S4. Optimization of light-inducible, neuron-specific gene expression using the GAVPO system.** (A-B) *Tg(elav13:GAVPO; UAS:NTR-mCherry)* embryos were irradiated globally for varying durations, starting at 48 hpf and using a (A) blue LED lamp or (B) white LED lamp. The embryos were imaged at 56 hpf, and representative brightfield and epifluorescence micrographs are shown. (C) Quantification of mCherry fluorescence in *Tg(elav13:GAVPO; UAS:NTR-mCherry)* embryos irradiated as described in A-B. Embryo orientations: lateral view and anterior left. Scale bars: 500  $\mu$ m.

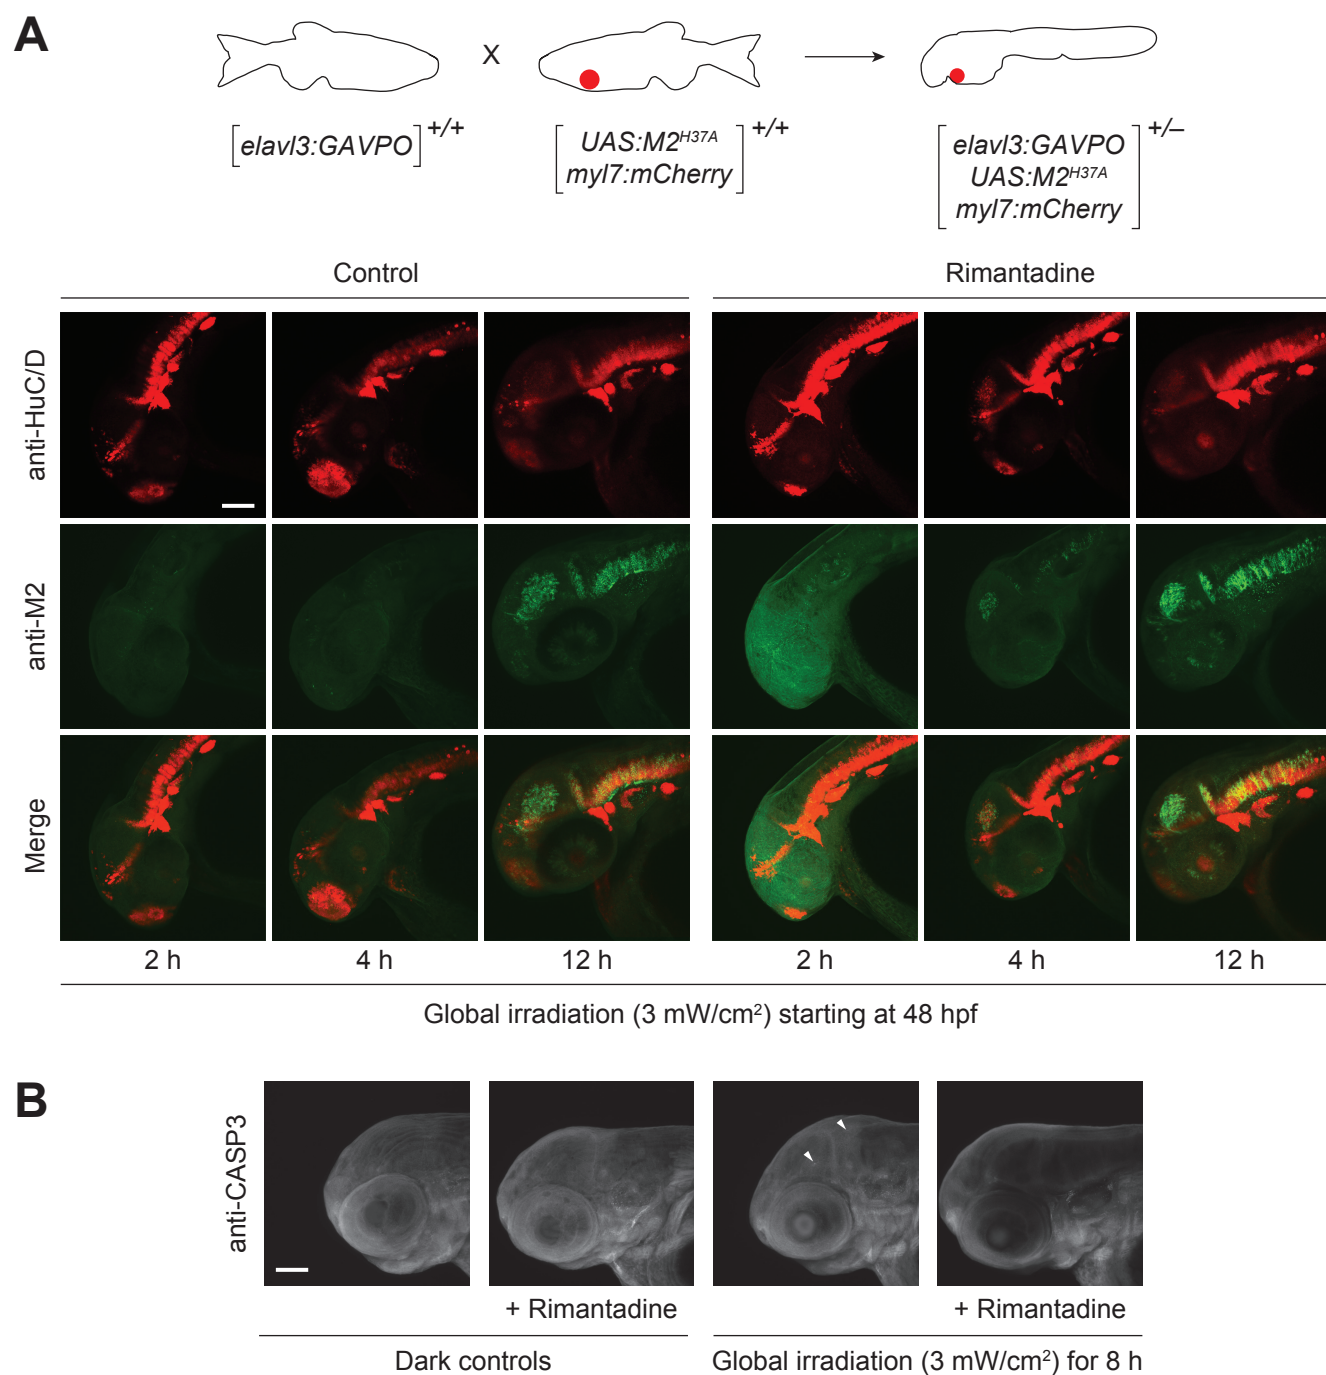

**Figure S5. Light-inducible, neuron-specific M2<sup>H37A</sup> expression using the GAVPO system.** (A) *Tg(elav13:GAVPO; UAS:M2<sup>H37A</sup>;myl7:mCherry)* embryos were globally irradiated with blue LED light at 48 hpf for the designated durations and cultured in the presence or absence of rimantadine. The embryos were then fixed, and immunostained for M2 and HuC/D expression. Representative confocal micrographs are shown as maximum intensity projections of 39 to 51 z-stack images (5- $\mu$ m optical sections), demonstrating overlapping domains of M2<sup>H37A</sup> and HuC/D expression in the anterior CNS. (B) *Tg(elav13:GAVPO;UAS:M2<sup>H37A</sup>;myl7:mCherry)* embryos were globally irradiated with blue LED light at 48 hpf for 8 h and cultured in the presence or absence of rimantadine. The embryos were fixed 12 h later, and immunostained for activated caspase-3. Representative confocal micrographs are shown as maximum intensity projections of 30 to 50 z-stack images (7- $\mu$ m optical sections), demonstrating limited non-cell autonomous apoptosis. Arrowheads: cells with activated caspase-3. Embryo orientations: lateral view, anterior left. Scale bars: 1-0  $\mu$ m.
